# Supplementary material for: RETRACTED: A Dietary Combination of Forskolin with Homotaurine, Spearmint and B Vitamins Protects Injured Retinal Ganglion Cells in a Rodent Model of Hypertensive Glaucoma
Source: PubMed Central journal article supplement (PMC7230514; doi:10.3390/nu12041189), 2020-04-23
Supplement: nutrients-12-01189-s001.pdf [file nutrients-12-01189-s001.pdf]

**Table S1.** List of antibodies used in Western blot.

| <b>Antibody</b>                            | <b>Dilution</b> | <b>Source</b>             | <b>Cat. No.</b> |
|--------------------------------------------|-----------------|---------------------------|-----------------|
| Rabbit monoclonal anti-Iba1                | 1:1000          | Abcam                     | ab178846        |
| Mouse monoclonal anti-GFAP                 | 1:1000          | Sigma-Aldrich             | G3893           |
| Rabbit polyclonal anti-pNF-kB p65 (Ser276) | 1:200           | Santa Cruz Biotechnology  | sc-101749       |
| Rabbit polyclonal anti-NF-kB p65           | 1:200           | Santa Cruz Biotechnology  | sc-372          |
| Rabbit polyclonal anti-TNF- $\alpha$       | 1:1000          | Abcam                     | ab6671          |
| Rabbit polyclonal anti-IL-6                | 1:200           | Abcam                     | ab6672          |
| Goat polyclonal anti-IL-10                 | 1:100           | Santa Cruz Biotechnology  | sc-1783         |
| Rabbit polyclonal anti-Bax                 | 1:100           | Santa Cruz Biotechnology  | sc-493          |
| Rabbit polyclonal anti-Bcl-2               | 1:100           | Santa Cruz Biotechnology  | sc-492          |
| Rabbit monoclonal anti-cleaved caspase 3   | 1:1000          | Cell Signaling Technology | 9664            |
| Mouse monoclonal anti- $\beta$ -actin      | 1:2500          | Sigma-Aldrich             | A2228           |
